# Supplementary material for: Differential Colonization and Mucus Ultrastructure Visualization in Bovine Ileal and Rectal Organoid-Derived Monolayers Exposed to Enterohemorrhagic Escherichia coli
Source: MDPI journal article supplement (doi:10.3390/ijms25094914), 2024-04-30
Supplement: s1 [file s1]

# Differential Colonization and Mucus Ultrastructure Visualization in Bovine Ileal and Rectal Organoid-Derived Monolayers Exposed to Enterohemorrhagic *Escherichia coli*

Minae Kawasaki and Yoko M. Ambrosini \*

Department of Veterinary Clinical Sciences, College of Veterinary Medicine, Washington State University, Pullman, WA 99164, USA; minae.kawasaki@wsu.edu

\* Correspondence: yoko.ambrosini@wsu.edu

## Supplementary Information

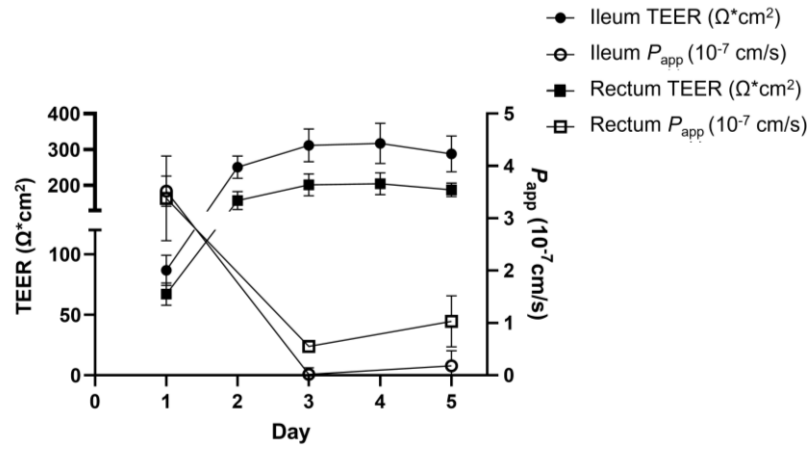

**Figure S1: Development of stable bovine ileal and rectal organoid-derived monolayers prior to EHEC infection.** Daily transepithelial electrical resistance (TEER) measurements and permeability ( $P_{\text{app}}$ ) assay at Day 1, 3, and 5 using 4 kDa FITC-dextran were utilized to confirm establishment of functional epithelial barrier integrity. The results are presented as mean  $\pm$  standard error of the mean (sem) from at least two technical and three biological replicates.

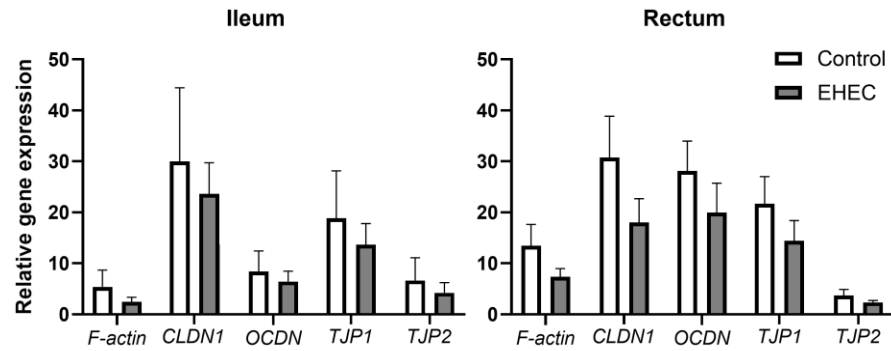

**Figure S2. Impact of EHEC infection on expression of actin filament and junctional protein genes.** RT-qPCR of control and EHEC-infected monolayers revealed no difference in expression levels of *F-actin*, *CLDN1*, *OCDN*, *TJP1* and *TJP2* genes between each other in both ileal and rectal monolayers at 4 h post infection. Relative gene expression levels were calculated using *GAPDH*, *RPL0* and *ACTB* as the internal control. Two technical replicates from three biological replicates were evaluated. Data are expressed as the mean  $\pm$  sem.

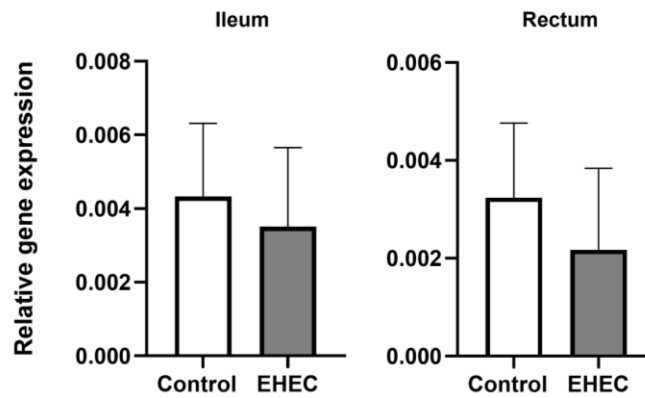

**Figure S3. Relative gene expression levels of *MUC2* in control and EHEC-infected monolayers.** RT-qPCR analysis revealed no differences between two groups in both ileal and rectal monolayers at 4 h post infection. Relative gene expression levels were calculated using *GAPDH*, *RPL0* and *ACTB* as the internal control. Two technical replicates from three biological replicates were evaluated. Data are expressed as the mean  $\pm$  sem.

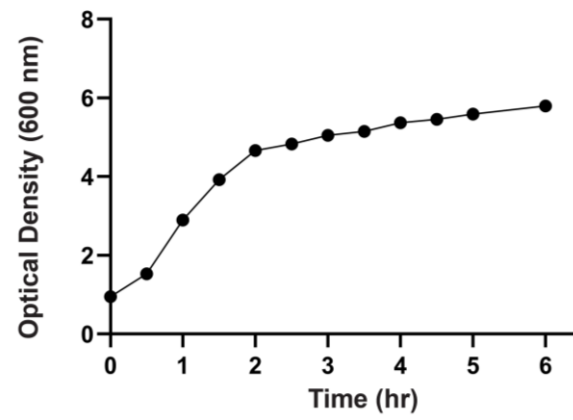

**Figure S4. Growth profile of EHEC strain used in this study.** The bacteria were grown in LB broth at 37 °C with shaking at 200 rpm. An overnight culture was diluted 1:10 into fresh LB broth at time 0.

**Table S1. Culture media compositions for growth and maintenance of bovine ileal and rectal organoids and organoid-derived monolayers.**

| Reagent                      | Supplier              | Final Concentration | Organoid Culture Medium | Ileal Monolayer Culture Medium | Rectal Monolayer Culture Medium |
|------------------------------|-----------------------|---------------------|-------------------------|--------------------------------|---------------------------------|
| Advanced DMEM/F12            | Gibco                 | NA                  | +                       | +                              | +                               |
| Noggin Conditioned Medium    | N/A                   | 10% (v/v)           | +                       | +                              | +                               |
| R-Spondin Conditioned Medium | N/A                   | 20% (v/v)           | +                       | +                              | +                               |
| Recombinant Murine Wnt-3a    | PeproTech             | 100 ng/mL           | +                       | +                              | +                               |
| A-83-01                      | Sigma-Aldrich         | 500 nM              | +                       | +                              | +                               |
| B27                          | Gibco                 | 1x                  | +                       | +                              | +                               |
| Murine EGF                   | R&D Systems           | 50 ng/mL            | +                       | +                              | +                               |
| Gastrin                      | Sigma-Aldrich         | 10 nM               | +                       | +                              | +                               |
| N2                           | R&D Systems           | 1x                  | +                       | +                              | +                               |
| Nicotinamide                 | Sigma-Aldrich         | 10 mM               | +                       | +                              | +                               |
| N-Acetyl-L-cysteine          | MP Biomedicals        | 1 mM                | +                       | +                              | +                               |
| SB202190                     | Sigma-Aldrich         | 10 $\mu$ M          | +                       | +                              | +                               |
| Primocin                     | InvivoGen             | 100 $\mu$ g/mL      | +                       | -                              | -                               |
| Penicillin/Streptomycin      | Gibco                 | 1x                  | +                       | -                              | -                               |
| GlutaMAX-I                   | Gibco                 | 2 mM                | +                       | +                              | +                               |
| HEPES                        | Gibco                 | 10 mM               | +                       | +                              | +                               |
| CHIR99021                    | Sigma-Aldrich         | 100 nM              | + <sup>1</sup>          | -                              | +                               |
| Y-27632                      | StemCell Technologies | 10 $\mu$ M          | + <sup>1</sup>          | +                              | +                               |
| LY2157299                    | Sigma-Aldrich         | 500 nM              | -                       | +                              | +                               |
| Fetal Bovine Serum           | Gibco                 | 20% (v/v)           | -                       | +                              | +                               |

<sup>1</sup> The reagent is withdrawn from the medium after the first 2-4 days of culture.
